# Supplementary material
Source: PubMed Central journal article supplement (PMC2290799)

**A**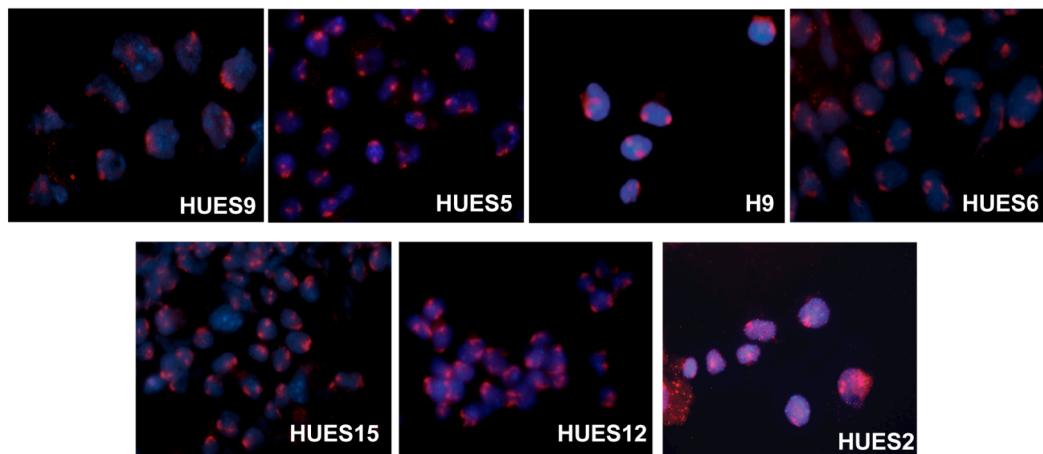**B**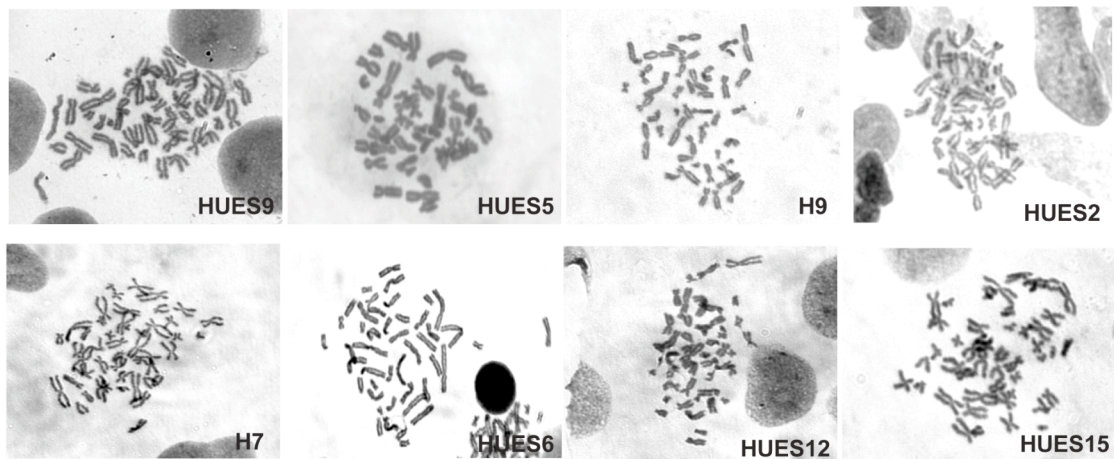

Supplement: pnas_0712136105_1.pdf [file pnas_0712136105_1.pdf]

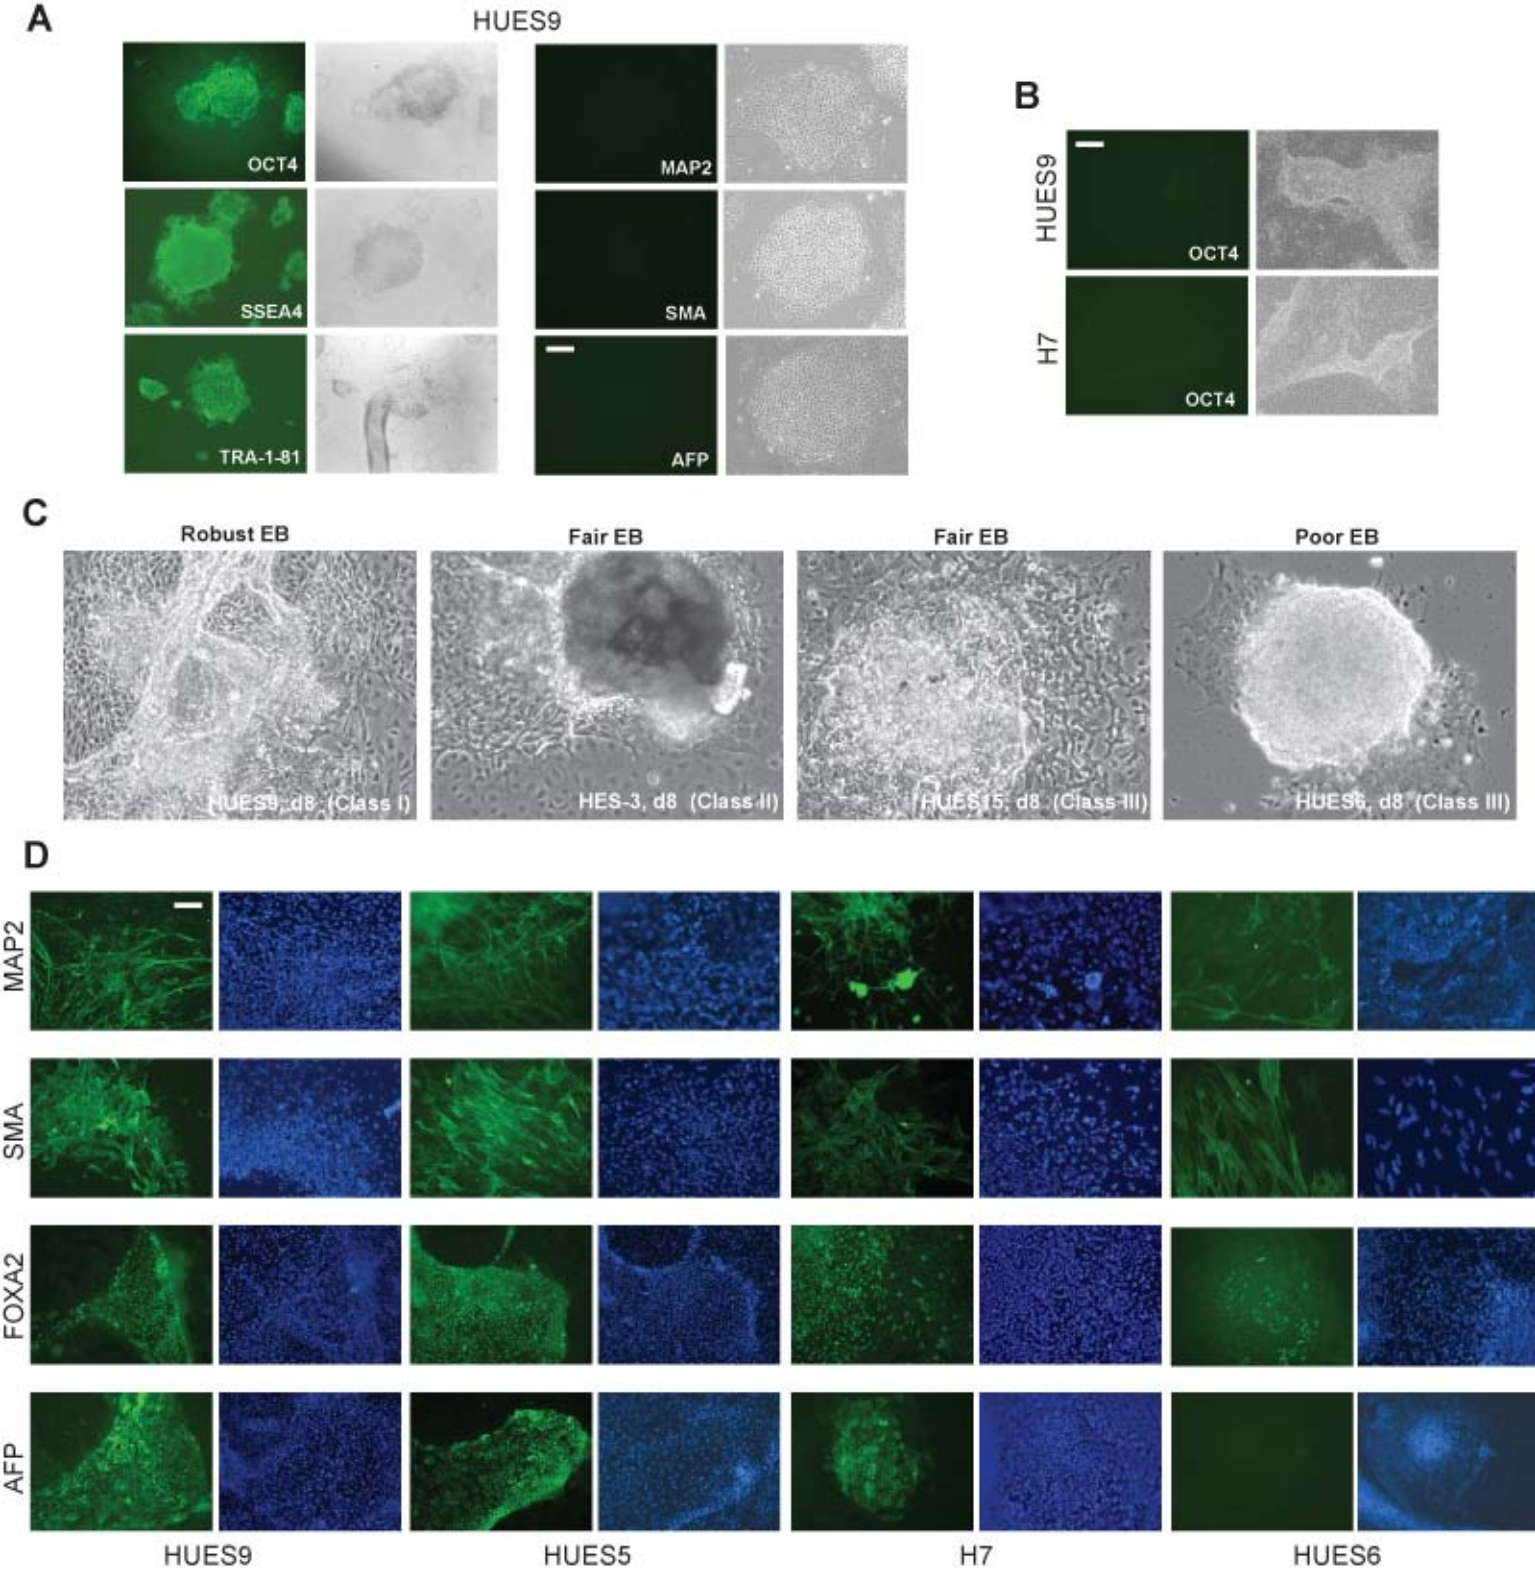

Figure 5 - Silva et al.

Supplement: pnas_0712136105_2.pdf [file pnas_0712136105_2.pdf]
